# Supplementary material for: Orchard layout and plant traits influence fruit yield more strongly than pollinator behaviour and density in a dioecious crop
Source: PLoS One. 2020 Oct 23;15(10):e0231120. doi: 10.1371/journal.pone.0231120 (PMC7584186; doi:10.1371/journal.pone.0231120)
Supplement: S1 Available code — (M) [file pone.0231120.s002.m]

%% Matlab code for Delayed plant-pollinator model 
% Recreates base simulations in Figure 4 of manuscript: 
%Orchard layout and plant traits influence fruit yield more strongly than pollinator behaviour and density in a dioecious crop
%By Peace et al. 2020 PLOSONE. 

function PollinationSims
%% intialization: 
set(0,'DefaultAxesFontSize',15)
 clear all
 close all
 clc

global alpha beta delta rho epsilon omega1 omega2 omega3 t_f tau_f sigma_f t_m tau_m sigma_m B_m B_f theta_f theta_m O_m O_f BeeDensity
global Tend Pm1_0 Pm2_0 Pm3_0 Pf_0

 BaselineParamValues; %function below sets all parameter values at baseline      
 Tend=20; % To set total time span here.
 
  P=(rho*B_f)/1000; %total number of pollinators 
  
  %Initial Conditions: 
   Pm1_0=0; %0.1*(BeeDensity*(B_m+B_f)/1000); % number of pollinaotrs with high pollen load
   Pm2_0=0; % number of pollinaotrs with medium pollen load
   Pm3_0=0; % number of pollinaotrs with low pollen load
   Pf_0=P;%0.9*P;% number of pollinaotrs with no pollen load
           
%% Using matlab's built in solvers to solve the system:

global t_his y_his %ODE solution determined for history of delay:

%Use ODE for t0 to min(tauf, taum):   
IC=[Pm1_0;Pm2_0;Pm3_0; Pf_0;0;0;0;0;0;0];   
[t_his, y_his]=ode45(@pollination_no_delay,[0 min(tau_f, tau_m)],IC);

 %Now use DDE for min(tauf, taum) to max(tauf, taum):
 if tau_f<tau_m 
     sol=dde23(@pollination_with_singledelay_f, tau_f, @pollination_history, [ tau_f, tau_m]);
 else 
     sol=dde23(@pollination_with_singledelay_m, tau_m, @pollination_history, [tau_m,tau_f]);    
 end
 
%put solutions together to form total history: 
 t_his=[t_his' sol.x]';
 y_his=[y_his' sol.y]';
 
%Now use DDE for max(tauf, taum) to tend:
sol=dde23(@pollination_with_delay, [tau_f tau_m], @pollination_history, [max(tau_f, tau_m), Tend]);

%put solutions together: 
t=[t_his' sol.x]; 
pm1=[y_his(:,1)' sol.y(1,:)];
pm2=[y_his(:,2)' sol.y(2,:)];
pm3=[y_his(:,3)' sol.y(3,:)];
pf=[y_his(:,4)' sol.y(4,:)];
F=[y_his(:,5)' sol.y(5,:)];
M=[y_his(:,6)' sol.y(6,:)];
VisitM1=[y_his(:,7)' sol.y(7,:)];
VisitM2=[y_his(:,8)' sol.y(8,:)];
VisitM3=[y_his(:,9)' sol.y(9,:)];
PollenDep=[y_his(:,10)' sol.y(10,:)];

for i=1:length(t)
    if t(i)-tau_f>0
    n=find(t>t(i)-tau_f,1);
     Fcurrent(i)=F(i)-F(n);
    else 
        Fcurrent(i)=F(i);
    end
end

for i=1:length(t)
    if t(i)-tau_m>0
    n=find(t>t(i)-tau_m,1);
     Mcurrent(i)=M(i)-M(n);
    else 
        Mcurrent(i)=M(i);
    end
end

max_open_flower=max(Fcurrent+Mcurrent);

%% Plots for figure 4
figure(1) 
plot(t,pm1,'b','LineWidth',2)
hold on
plot(t,pm2,'r','LineWidth',2)
plot(t,pm3,'c', 'LineWidth',2)
plot(t,pf,'k','LineWidth',2)
legend('P_{m_1}','P_{m_2}','P_{m_3}','P_f')
xlabel('Time (days)')
ylabel('Pollinators')

figure(2) 
plot(t,VisitM1,'b', 'LineWidth',2)
hold on
plot(t,VisitM2,'r', 'LineWidth',2)
plot(t,VisitM3,'c', 'LineWidth',2)
legend('P_{m1} --> P_{m2}','P_{m2} --> P_{m3}','P_{m3} --> P_f', 'Location', 'northwest')
xlabel('Time (days)')
ylabel('Pollinator transitional visits')

figure(3)
plot(t, Mcurrent,'b', 'LineWidth', 2)
hold on
plot(t, Fcurrent,'r', 'LineWidth', 2)
legend('Male', 'Female')
xlabel('Time (days)')
ylabel('Open flowers')

figure(4)
%Determine total number of visits:
   vv=(alpha*(Fcurrent+Mcurrent))./(1+alpha*beta*(Fcurrent+Mcurrent)); %visitation rate
   visit1=vv.*((1-(Mcurrent./(Fcurrent+Mcurrent)).^delta).*pm1); %Number of Visits Pm1 to Pm2 
   visit2=vv.*((Fcurrent./(Fcurrent+Mcurrent)).^epsilon.*pm2); %Number of Visits Pm2 to Pm3 
   visit3=vv.*((Fcurrent./(Fcurrent+Mcurrent)).^epsilon.*pm3); %Number of Visits Pm3 to pf
   pollen= omega1*visit1+omega2*visit2+omega3*visit3;%Pollen deposited on all female flowers
subplot(1,3,1)
plot(t, visit1, 'LineWidth', 2)
xlabel('time (days)')
ylabel('Type 1 visits')
ylim([0, 8*10^4])
subplot(1,3,2)
plot(t, visit2, 'LineWidth', 2)
xlabel('time (days)')
ylabel('Type 2 visits')
ylim([0, 8*10^4])
subplot(1,3,3)
plot(t, visit3, 'LineWidth', 2)
xlabel('time (days)')
ylabel('Type 3 visits')
ylim([0, 8*10^4])

figure(5) %Visualizing pollen deposited per day: 
for daynumber=1:Tend
    n=find(t>=daynumber,1);
    Dailyvisit1(daynumber)=visit1(n);
    Dailyvisit2(daynumber)=visit2(n);
    Dailyvisit3(daynumber)=visit3(n);
    DailyFcurrent(daynumber)=Fcurrent(n);
end
DVT1PF=Dailyvisit1./DailyFcurrent;
DVT2PF=Dailyvisit2./DailyFcurrent;
DVT3PF=Dailyvisit3./DailyFcurrent;

% Find the Total Daily Visit Per Female Flower at the time of closing
for i=1:(Tend-tau_f+1)
    TDVT1PF(i)=0; % Total Daily Type 1 Visit Per Female Flower at the time of closing
    TDVT2PF(i)=0; % Total Daily Type 2 Visit Per Female Flower at the time of closing
    TDVT3PF(i)=0; % Total Daily Type 3 Visit Per Female Flower at the time of closing

    for j=i:(i+tau_f-1)
    TDVT1PF(i)=TDVT1PF(i)+DVT1PF(j); % Total Daily Type 1 Visit Per Female Flower at the time of closing
    TDVT2PF(i)=TDVT2PF(i)+DVT2PF(j); % Total Daily Type 2 Visit Per Female Flower at the time of closing
    TDVT3PF(i)=TDVT3PF(i)+DVT3PF(j); % Total Daily Type 3 Visit Per Female Flower at the time of closing
    end
    TDVT1PF(i);
    TDVT2PF(i);
    TDVT3PF(i);
end
xx=tau_f:Tend;

plot(xx, log10(TDVT1PF), 'r', xx, log10(TDVT2PF), 'b', xx, log10(TDVT3PF),'c', 'LineWidth', 2)
%yticks()
yticks(-0.5:0.5:4.5)
yticklabels({'10^{-0.5}','10^0','10^{0.5}', '10', '10^{1.5}', '10^2','10^{2.5}','10^3','10^{3.5}', '10^4', '10^{4.5}'})
xlabel('Day When Female Flowers Close')
ylabel('Total Accumulated Visits')
legend('Type 1 visit: P_{m1}->P_{m2}','Type 2 visit: P_{m2}->P_{m3}','Type 3 visit: P_{m3}->P_{mf}', 'Location', 'Southeast' )

figure(6)
%percent chance to set fruit from one visit
p_1=0.66; % min for p_1=0.25, max for p_1=0.75
p_2=0.55; % min for p_2=0.1, max for p_2=0.65 
p_3=0.22; % min for p_3=0, max for p_3=0.5 
plot(xx, 1-(1-p_1).^TDVT1PF, 'r', ...
    xx, 1-(1-p_2).^TDVT2PF, 'b',...
    xx, 1-(1-p_3).^TDVT3PF,'c',...
    xx, 1-(1-p_1).^TDVT1PF.*(1-p_2).^TDVT2PF.*(1-p_3).^TDVT3PF ,'k',...
    'LineWidth', 2);
xlabel('Day When Female Flower Closes')
ylabel('Predicted Yield Proportion')
legend('Type 1 visit: P_{m1}->P_{m2}','Type 2 visit: P_{m2}->P_{m3}','Type 3 visit: P_{m3}->P_{mf}', 'All visits', 'Location', 'Southeast' )

%% Output total predicted fruitset into command window: 
% To calculate the total predicted fruitsets

for daynumber=1:Tend
    n=find(t>=daynumber,1);
   CummulatedF(daynumber)=F(n); 
end
for i=1:(Tend-tau_f+1)
    if i==1
        DailyFclosing(i)=CummulatedF(i);
    else
DailyFclosing(i)=CummulatedF(i)-CummulatedF(i-1);
    end 
end

total_predict_fruitsets=sum(DailyFclosing.*(1-(1-p_1).^TDVT1PF.*(1-p_2).^TDVT2PF.*(1-p_3).^TDVT3PF))/(B_f) %outputs to command window


function dy= pollination_no_delay(t, y)
    global alpha beta delta epsilon omega1 omega2 omega3 t_f sigma_f t_m sigma_m B_m B_f theta_f theta_m O_m O_f
     pm1=y(1); pm2=y(2); pm3=y(3); pf=y(4); F=y(5); M=y(6); 

            v=(alpha*(F+M))/(1+alpha*beta*(F+M)); %visitation rate
            if F+M==0 %No flowers open, so no visits occur
               dpm1=pm1; dpm2=pm2; dpm3=pm3; dpf=pf; 
               dvisit1=y(7); dvisit2=y(8);  dvisit3=y(9);
               
            else  %FLowers are open and visit occur: 
            dpm1=v*((1-(F/(F+M))^epsilon)*(pm2+pm3+pf)-(1-(M/(F+M))^delta)*pm1);
            dpm2=v*((1-(M/(F+M))^delta)*pm1-(1-(F/(F+M))^epsilon)*pm2-(F/(F+M))^epsilon*pm2);
            dpm3=v*((F/(F+M))^epsilon*pm2-(1-(F/(F+M))^epsilon)*pm3-(F/(F+M))^epsilon*pm3);
            dpf=v*((F/(F+M))^epsilon*pm3-(1-(F/(F+M))^epsilon)*pf);
          
            % tracking the visit:
              dvisit1=v*((1-(M/(F+M))^delta)*pm1); %Number of Visits Pm1 to Pm2 
              dvisit2=v*((F/(F+M))^epsilon*pm2); %Number of Visits Pm2 to Pm3 
              dvisit3=v*((F/(F+M))^epsilon*pm3); %Number of Visits Pm3 to pf

            end
            
            theta_f=1/sqrt(2*pi*sigma_f^2);
            theta_m=1/sqrt(2*pi*sigma_m^2);
            O_f=theta_f*B_f; 
            O_m=theta_m*B_m; 
            dF=O_f*exp(-(t-t_f)^2/(2*(sigma_f)^2));
            dM=O_m*exp(-(t-t_m)^2/(2*(sigma_m)^2));
       
            dpollen= omega1*dvisit1+omega2*dvisit2+omega3*dvisit3;%Pollen deposited on all female flowers

    dy=[dpm1; dpm2; dpm3; dpf; dF; dM; dvisit1; dvisit2; dvisit3; dpollen];

   function H=pollination_history(t)
       global t_his y_his
       %Find y_his vector this particular t:

       n=find(t_his>=t,1);
       H=y_his(n,:);
       
       

      
function dy= pollination_with_delay(t,y,z)
global alpha beta delta epsilon omega1 omega2 omega3 t_f sigma_f t_m sigma_m B_m B_f theta_f theta_m O_m O_f
ylag1=z(:,1);
      ylag2=z(:,2);
        pm1=y(1); pm2=y(2); pm3=y(3); pf=y(4);
        f=y(5)-ylag1(5); m=y(6)-ylag2(6); 
        
        v=(alpha*(f+m))/(1+alpha*beta*(f+m)); %visitation rate
        dpm1=v*((1-(f/(f+m))^epsilon)*(pm2+pm3+pf)-(1-(m/(f+m))^delta)*pm1);
        dpm2=v*((1-(m/(f+m))^delta)*pm1-(1-(f/(f+m))^epsilon)*pm2-(f/(f+m))^epsilon*pm2);
        dpm3=v*((f/(f+m))^epsilon*pm2-(1-(f/(f+m))^epsilon)*pm3-(f/(f+m))^epsilon*pm3);
        dpf=v*((f/(f+m))^epsilon*pm3-(1-(f/(f+m))^epsilon)*pf); 
        
        
            theta_f=1/sqrt(2*pi*sigma_f^2);
            theta_m=1/sqrt(2*pi*sigma_m^2);
            O_f=theta_f*B_f; 
            O_m=theta_m*B_m; 
        
        dF=O_f*exp(-(t-t_f)^2/(2*(sigma_f)^2));
        dM=O_m*exp(-(t-t_m)^2/(2*(sigma_m)^2));
        
   % tracking the visit
   dvisit1=v*((1-(m/(f+m))^delta)*pm1); %Number of Visits Pm1 to Pm2 
   dvisit2=v*((f/(f+m))^epsilon*pm2); %Number of Visits Pm2 to Pm3 
   dvisit3=v*((f/(f+m))^epsilon*pm3); %Number of Visits Pm3 to pf
   dpollen= omega1*dvisit1+omega2*dvisit2+omega3*dvisit3;%Pollen deposited on all female flowers
   
   %If all flowers have closed, no visits will occur and we need to set
   %right hand side to 0: 
   if (f==0 && m==0)
       %Here v=0. 
      dpm1=0;  
      dpm2=0;
      dpm3=0;
      dvisit1=0;
      dvisit2=0;
      dvisit3=0;
      dpollen=0;
   end
       
dy=[dpm1; dpm2; dpm3; dpf; dF; dM; dvisit1; dvisit2; dvisit3; dpollen];


function dy= pollination_with_singledelay_f(t,y,z)
global alpha beta delta epsilon omega1 omega2 omega3 t_f sigma_f t_m sigma_m B_m B_f theta_f theta_m O_m O_f
ylag1=z(:,1);

        pm1=y(1); pm2=y(2); pm3=y(3); pf=y(4);
        f=y(5)-ylag1(5); m=y(6);
        
        v=(alpha*(f+m))/(1+alpha*beta*(f+m)); %visitation rate
        dpm1=v*((1-(f/(f+m))^epsilon)*(pm2+pm3+pf)-(1-(m/(f+m))^delta)*pm1);
        dpm2=v*((1-(m/(f+m))^delta)*pm1-(1-(f/(f+m))^epsilon)*pm2-(f/(f+m))^epsilon*pm2);
        dpm3=v*((f/(f+m))^epsilon*pm2-(1-(f/(f+m))^epsilon)*pm3-(f/(f+m))^epsilon*pm3);
        dpf=v*((f/(f+m))^epsilon*pm3-(1-(f/(f+m))^epsilon)*pf); 
        
        
            theta_f=1/sqrt(2*pi*sigma_f^2);
            theta_m=1/sqrt(2*pi*sigma_m^2);
            O_f=theta_f*B_f; 
            O_m=theta_m*B_m; 

        dF=O_f*exp(-(t-t_f)^2/(2*(sigma_f)^2));
        dM=O_m*exp(-(t-t_m)^2/(2*(sigma_m)^2));
        
   % tracking the visit
   dvisit1=v*((1-(m/(f+m))^delta)*pm1); %Number of Visits Pm1 to Pm2 
   dvisit2=v*((f/(f+m))^epsilon*pm2); %Number of Visits Pm2 to Pm3 
   dvisit3=v*((f/(f+m))^epsilon*pm3); %Number of Visits Pm3 to pf
   dpollen= omega1*dvisit1+omega2*dvisit2+omega3*dvisit3;%Pollen deposited on all female flowers

dy=[dpm1; dpm2; dpm3; dpf; dF; dM; dvisit1; dvisit2; dvisit3; dpollen];
   

function dy= pollination_with_singledelay_m(t,y,z)
global alpha beta delta epsilon omega1 omega2 omega3 t_f sigma_f t_m sigma_m B_m B_f theta_f theta_m O_m O_f
     ylag1=z(:,1);
        pm1=y(1); pm2=y(2); pm3=y(3); pf=y(4);
        f=y(5); m=y(6)-ylag1(6); 
        
        v=(alpha*(f+m))/(1+alpha*beta*(f+m)); %visitation rate
        dpm1=v*((1-(f/(f+m))^epsilon)*(pm2+pm3+pf)-(1-(m/(f+m))^delta)*pm1);
        dpm2=v*((1-(m/(f+m))^delta)*pm1-(1-(f/(f+m))^epsilon)*pm2-(f/(f+m))^epsilon*pm2);
        dpm3=v*((f/(f+m))^epsilon*pm2-(1-(f/(f+m))^epsilon)*pm3-(f/(f+m))^epsilon*pm3);
        dpf=v*((f/(f+m))^epsilon*pm3-(1-(f/(f+m))^epsilon)*pf);
        
            theta_f=1/sqrt(2*pi*sigma_f^2);
            theta_m=1/sqrt(2*pi*sigma_m^2);
            O_f=theta_f*B_f; 
            O_m=theta_m*B_m;
            
        dF=O_f*exp(-(t-t_f)^2/(2*(sigma_f)^2));
        dM=O_m*exp(-(t-t_m)^2/(2*(sigma_m)^2));
        
   % tracking the visit
   dvisit1=v*((1-(m/(f+m))^delta)*pm1); %Number of Visits Pm1 to Pm2 
   dvisit2=v*((f/(f+m))^epsilon*pm2); %Number of Visits Pm2 to Pm3 
   dvisit3=v*((f/(f+m))^epsilon*pm3); %Number of Visits Pm3 to pf
   dpollen= omega1*dvisit1+omega2*dvisit2+omega3*dvisit3;%Pollen deposited on all female flowers

dy=[dpm1; dpm2; dpm3; dpf; dF; dM; dvisit1; dvisit2; dvisit3; dpollen]; 

function BaselineParamValues
%Baseline parameter values 
global alpha beta delta rho epsilon omega1 omega2 omega3 t_f tau_f sigma_f t_m tau_m sigma_m B_m B_f theta_f theta_m O_m O_f 
 global tend Pm1_0 Pm2_0 Pm3_0 Pf_0
     
        alpha=2*60*4;%480;%alpha=1.488*10^-4; %search rate
        beta=16/60/60/4 ;%handling time per day (60 min, 60 sec, only 4 hours of pollination
        delta=0.0634; %preference for going to male flower from female 
        epsilon=0.0725; %preference for going to female flower from male 
        
        tend=20;
        B_f= 600000; %total number of female flower buds
        t_f=6; % Peak day for the female flower openning rate
        tau_f=5; % lifespan of the female flower openning rate
        sigma_f=2; % variation of the female flower openning rate
        theta_f=1/sqrt(2*pi*sigma_f^2); %Should we just this instead of 0.2? See PDF of normal distribution
        O_f=theta_f*B_f; % Maxima female flower openning rate
        
        B_m= 600000; % total number of male flower buds
        t_m=6; % Peak day for the male flower openning rate
        tau_m=4; % lifespan of the male flower openning rate
        sigma_m=2.5; % variation of the male flower openning rate
        theta_m=1/sqrt(2*pi*sigma_m^2); %Should we just this instead of 0.2? See PDF of normal distribution
        O_m=theta_m*B_m;
               
        rho=6; % pollinator per 1000 flowers. Base value = 5, range (0-20). 
        P=(rho*(B_f)/1000); %total number of pollinators 
        
        %Initial Conditions: 
        Pm1_0=0; % number of pollinators with high pollen load
        Pm2_0=0; % number of pollinators with medium pollen load
        Pm3_0=0; % number of pollinators with low pollen load
        Pf_0=P;% number of pollinators with no pollen load
        
       omega1=1500; omega2=200; omega3=100; %loads of pollen deposited to females from each pm1-pm3 
        
